# Supplementary material for: Anti-Müllerian Hormone Type II Receptor Expression in Endometrial Cancer Tissue
Source: MDPI journal article supplement (doi:10.3390/cells9102312), 2020-10-17
Supplement: s1 [file s1]

Table S2. Demographic traits of woman distinguished according to the FIGO classification; in the Table shows: mean± SD, median (Q2), minimum and maximum values, N – sample size

| FIGO  | N  | Age<br>(years)                | BMI<br>(mass / height <sup>2</sup> ) | Years of<br>menstruation<br>(years) | Number of<br>births<br>(n) | Mass of newborn<br>(g)                        | Average time of<br>breastfeeding<br>(months) | Total time of<br>breastfeeding<br>(months) |
|-------|----|-------------------------------|--------------------------------------|-------------------------------------|----------------------------|-----------------------------------------------|----------------------------------------------|--------------------------------------------|
| 0     | 14 | 57.3±7.95;<br>55.5;<br>47-75  | 30.13±6.207;<br>30.0;<br>23.0-34.7   | 36.6±3.69;<br>36.0;<br>32-43        | 0.1±0.36;<br>0;<br>0-1     | 3343.6±438.91;<br>3400;<br>2350-3950          | 4.7±2.58;<br>3.5;<br>2-11                    | 11.8±10.39;<br>9.0;<br>3-44                |
| IA    | 99 | 60.8±9.38;<br>59.0;<br>39-83  | 30.95±5.879;<br>30.4;<br>17.1-49.2   | 36.6±4.52;<br>37.0;<br>22-44        | 0.3±0.68;<br>0<br>0-3      | 3453.0±450.30;<br>3500;<br>2300-4760<br>*N=89 | 6.3±6.15;<br>4.5;<br>0-24<br>*N=97           | 20.9±25.93;<br>12.0;<br>0-144<br>*N=97     |
| IB    | 57 | 63.8±8.99;<br>65.0;<br>42-83  | 30.20±5.586;<br>29.7;<br>20.9-45.9   | 35.9±4.96;<br>37.0;<br>17-47        | 0.3±0.60;<br>0;<br>0-2     | 3494.5±518.98;<br>3500;<br>1900-4790<br>*N=49 | 6.1±6.75;<br>3.0;<br>0-24<br>*N=56           | 19.2±25.60;<br>8.0;<br>0-91.8<br>*N=56     |
| II    | 29 | 67.0±9.01;<br>67.0;<br>51-87  | 31.82±6.702;<br>31.2;<br>18.3-48.3   | 37.2±5.78;<br>38.0;<br>14-47        | 0.2±0.49;<br>0;<br>0-2     | 3391.6±524.71;<br>3300;<br>1980-4250<br>*N=25 | 3.9±5.29;<br>1.5;<br>0-24<br>*N=29           | 15.1±25.50;<br>5.0;<br>0-120<br>*N=29      |
| IIIA  | 9  | 59.7±14.76;<br>58.0;<br>35-80 | 27.83±6.023;<br>28.6;<br>19.5-37.1   | 33.1±6.17;<br>36.0;<br>20-38        | 0.2±0.44;<br>0;<br>0-1     | 3716.2±323.37;<br>3625;<br>3310-4250<br>*N=8  | 6.6±5.77;<br>6.0;<br>0-18                    | 20.4±26.25;<br>12.0;<br>0-84               |
| IIIB  | 3  | 64.0±14.00;<br>70.0;<br>48-74 | 32.27±9.860;<br>35.1;<br>21.3-40.4   | 36.7±1.53;<br>36.0;<br>34-37        | 0;<br>0;<br>0-0            | 3416.7±693.42;<br>3600;<br>2650-4000          | 9.7±8.02;<br>9.0;<br>2-18                    | 39.7±35.30;<br>45.0;<br>2-72               |
| IIIC1 | 14 | 65.9±8.89;<br>65.5;<br>51-81  | 30.02±4.196;<br>29.0;<br>24.8-37.8   | 39.4±5.96;<br>40.5;<br>28-49        | 0.3±0.61;<br>0;<br>0-2     | 3383.1±458.77;<br>3200;<br>2800-4100          | 8.8±7.33;<br>9.4;<br>0-24                    | 30.0±28.10;<br>30.5;<br>0-96               |

| *N=13 |   |                               |                                    |                              |                 |                                      |                             |                                |
|-------|---|-------------------------------|------------------------------------|------------------------------|-----------------|--------------------------------------|-----------------------------|--------------------------------|
| IIIC2 | 2 | 65.0±14.14;<br>65.0;<br>55-75 | 24.95±1.626;<br>25.0;<br>23.8-26.1 | 36.5±0.71;<br>36.5;<br>36-37 | 0;<br>0;<br>0-0 | 3470.0±268.70;<br>3470;<br>3280-3660 | 5.6±7.99;<br>5.6;<br>0-11.3 | 17.0±23.97;<br>17.0;<br>0-33.9 |
| IVB   | 3 | 60.0±14.73;<br>52.0;<br>51-77 | 30.13±6.207;<br>29.8;<br>24.1-36.5 | 36.0±3.61;<br>37.0;<br>32-39 | 0;<br>0;<br>0-0 | 3666.7±152.75;<br>3700;<br>3500-3800 | 19.0±25.16;<br>6.0;<br>3-48 | 23.0±22.91;<br>18.0;<br>3-48   |
