# Supplementary material for: Anti-Müllerian Hormone Type II Receptor Expression in Endometrial Cancer Tissue
Source: MDPI journal article supplement (doi:10.3390/cells9102312), 2020-10-17
Supplement: s1 [file s1]

Table S3. Demographic traits of woman distinguished according to occurrence of diabetes type 2; in the Table shows: mean± SD, median (Q2), minimum and maximum values, N – sample size

| Diabetes type 2 | N   | Age<br>(years)               | BMI<br>(mass / height <sup>2</sup> ) | Years of<br>menstruation<br>(years) | Number of<br>births<br>(n) | Mass of newborn<br>(g)                         | Average time of<br>breastfeeding<br>(months) | Total time of<br>breastfeeding<br>(months) |
|-----------------|-----|------------------------------|--------------------------------------|-------------------------------------|----------------------------|------------------------------------------------|----------------------------------------------|--------------------------------------------|
| No              | 180 | 61.3±9.86;<br>60.0;<br>35-87 | 29.58±5.644;<br>29.2;<br>17.1-49.2   | 36.5±5.06;<br>37.0;<br>14-49        | 2.5±1.60;<br>2;<br>0-8     | 3419.7±477.27;<br>3500;<br>1900-4790<br>*N=161 | 5.9±6.59;<br>3.0;<br>0-48<br>*N=179          | 17.8±22.91;<br>9.0;<br>0-144<br>*N=179     |
| Yes             | 50  | 66.5±8.10;<br>66.0;<br>51-83 | 33.69±5.211;<br>33.2;<br>25.0-48.3   | 36.6±4.47;<br>37.0;<br>28-49        | 3.1±2.00;<br>3;<br>0-12    | 3588.4±423.14;<br>3630;<br>2830-4760<br>*N=45  | 7.4±7.17;<br>5.5;<br>0-24<br>*N=48           | 28.2±31.61;<br>18.0;<br>0-120<br>*N=48     |
