# Supplementary figures and images for: Anti-Müllerian Hormone Type II Receptor Expression in Endometrial Cancer Tissue
Source: MDPI journal article supplement (doi:10.3390/cells9102312), 2020-10-17

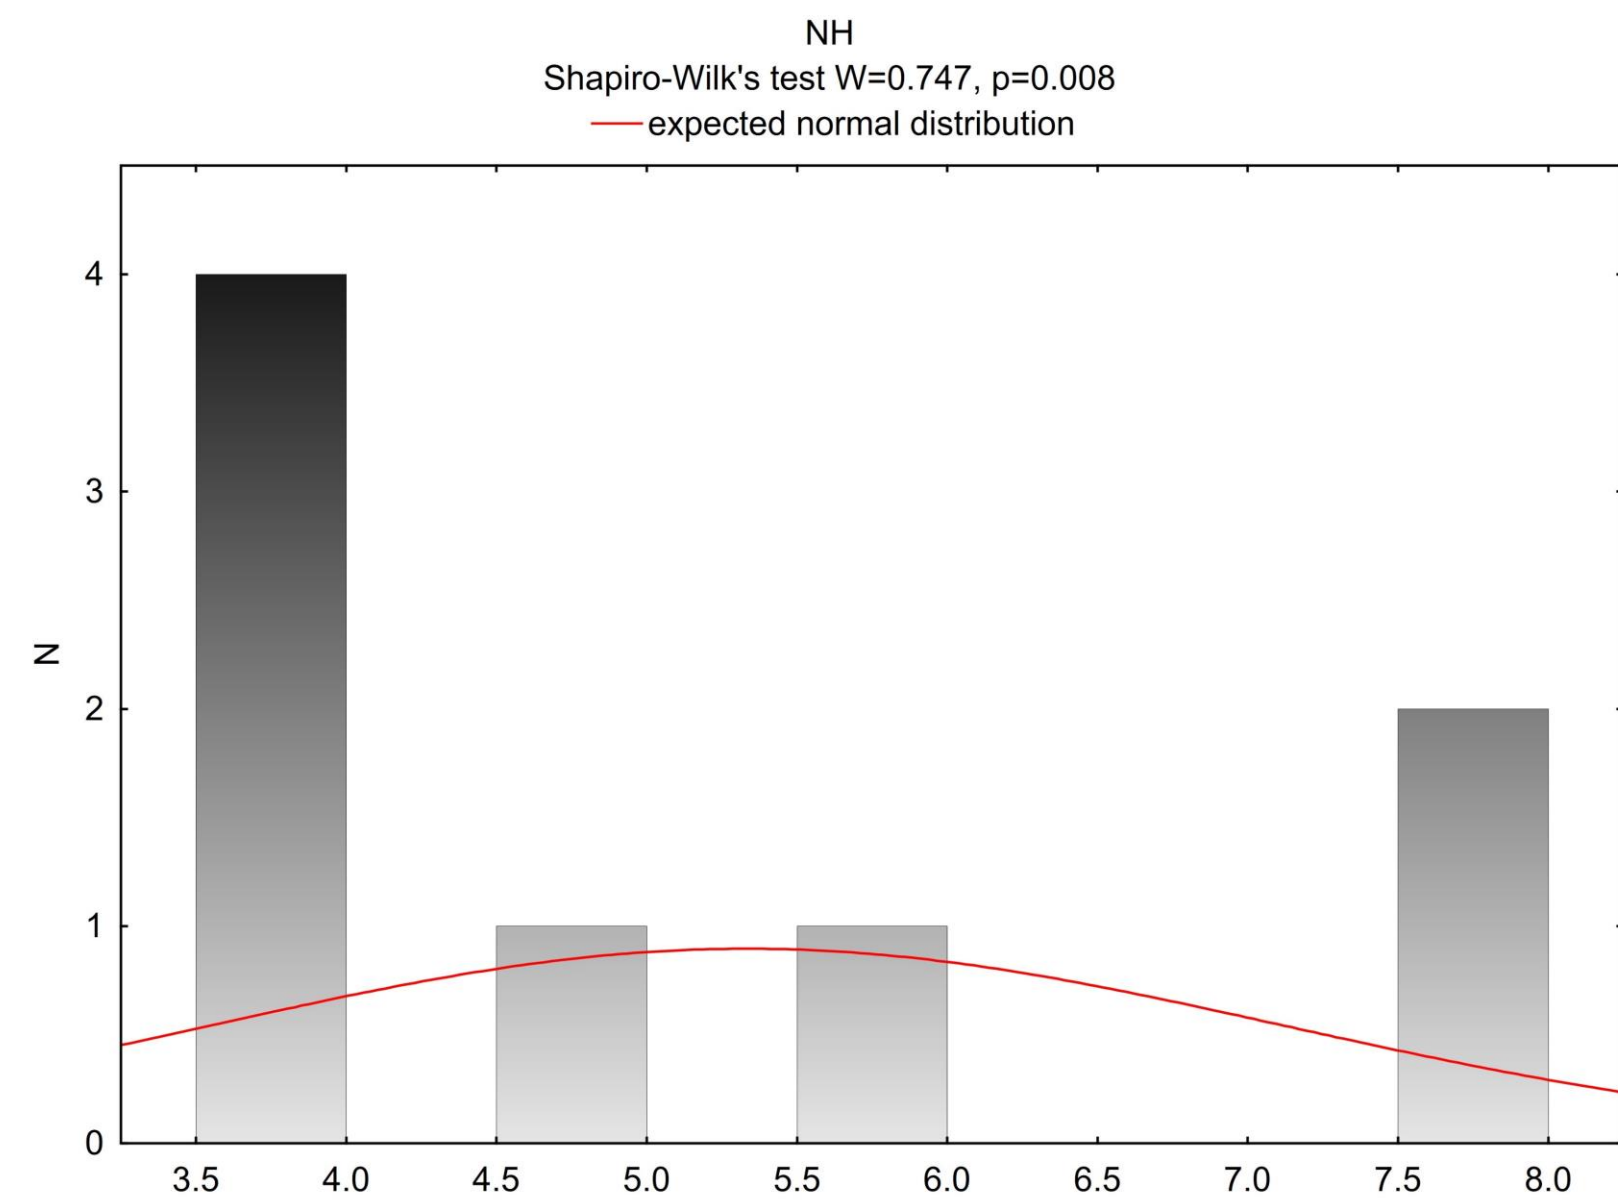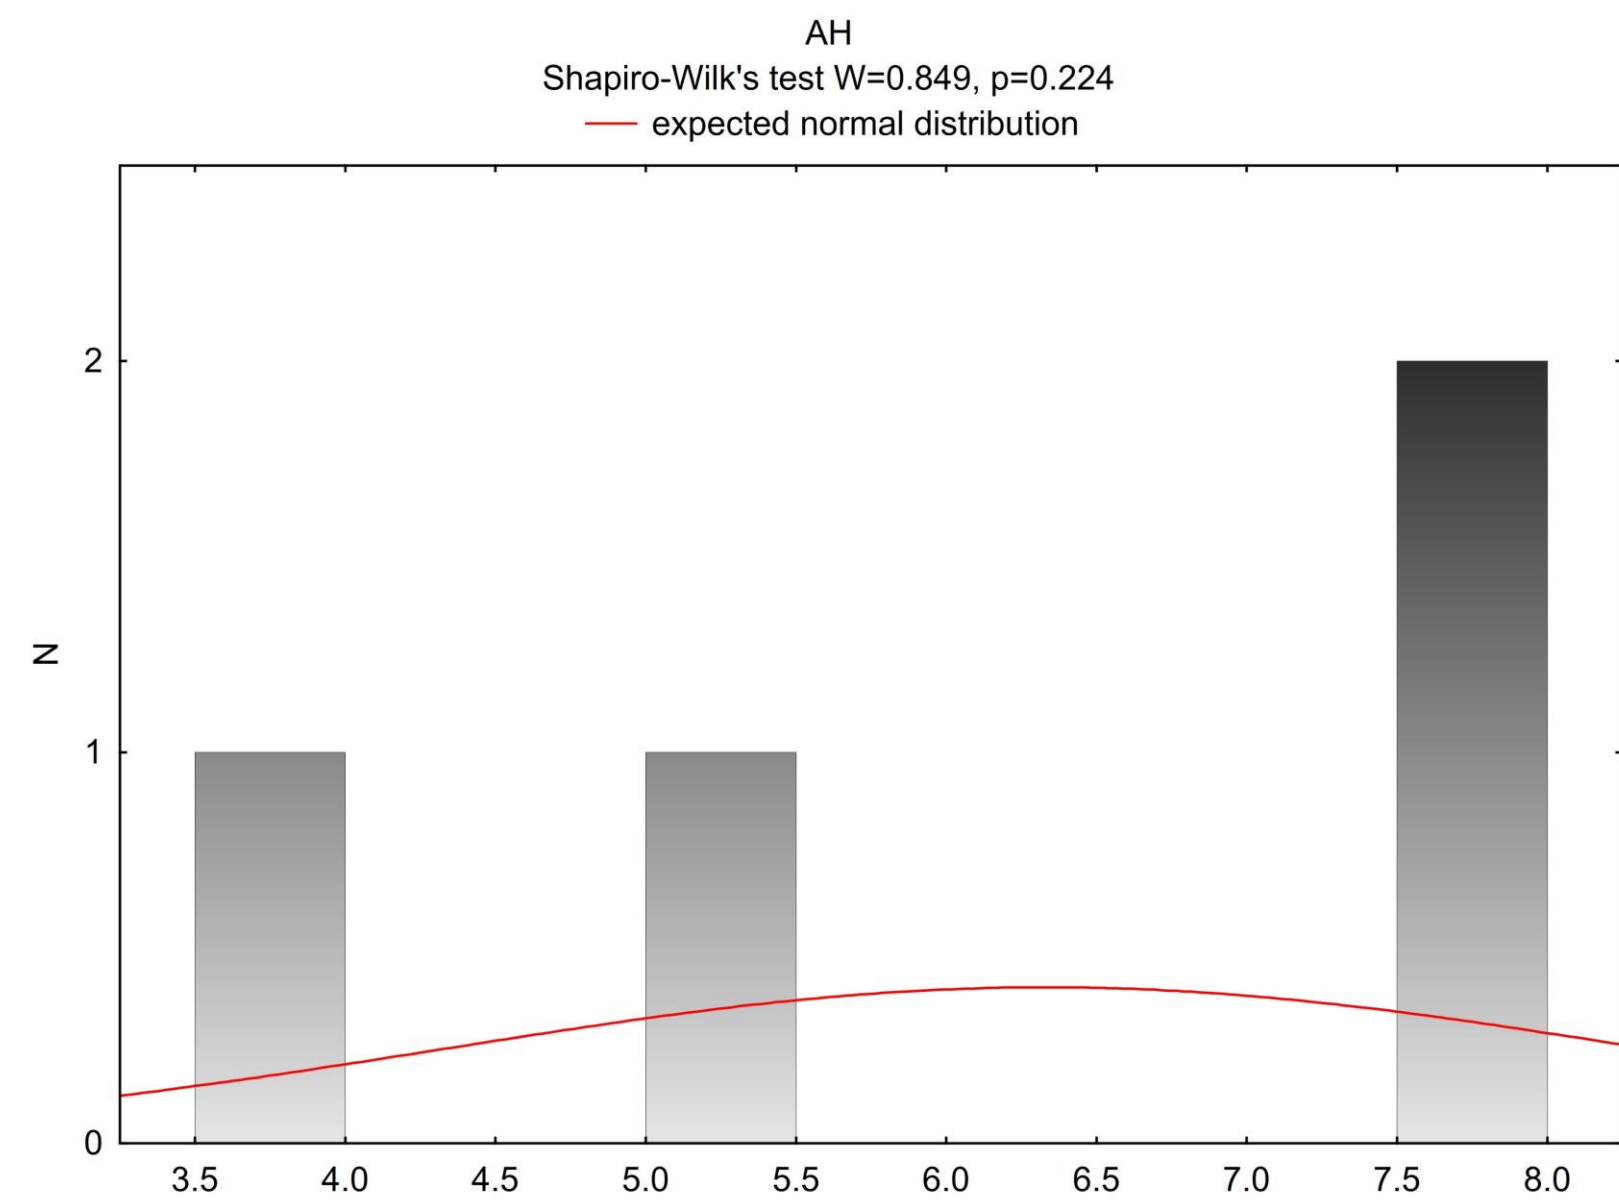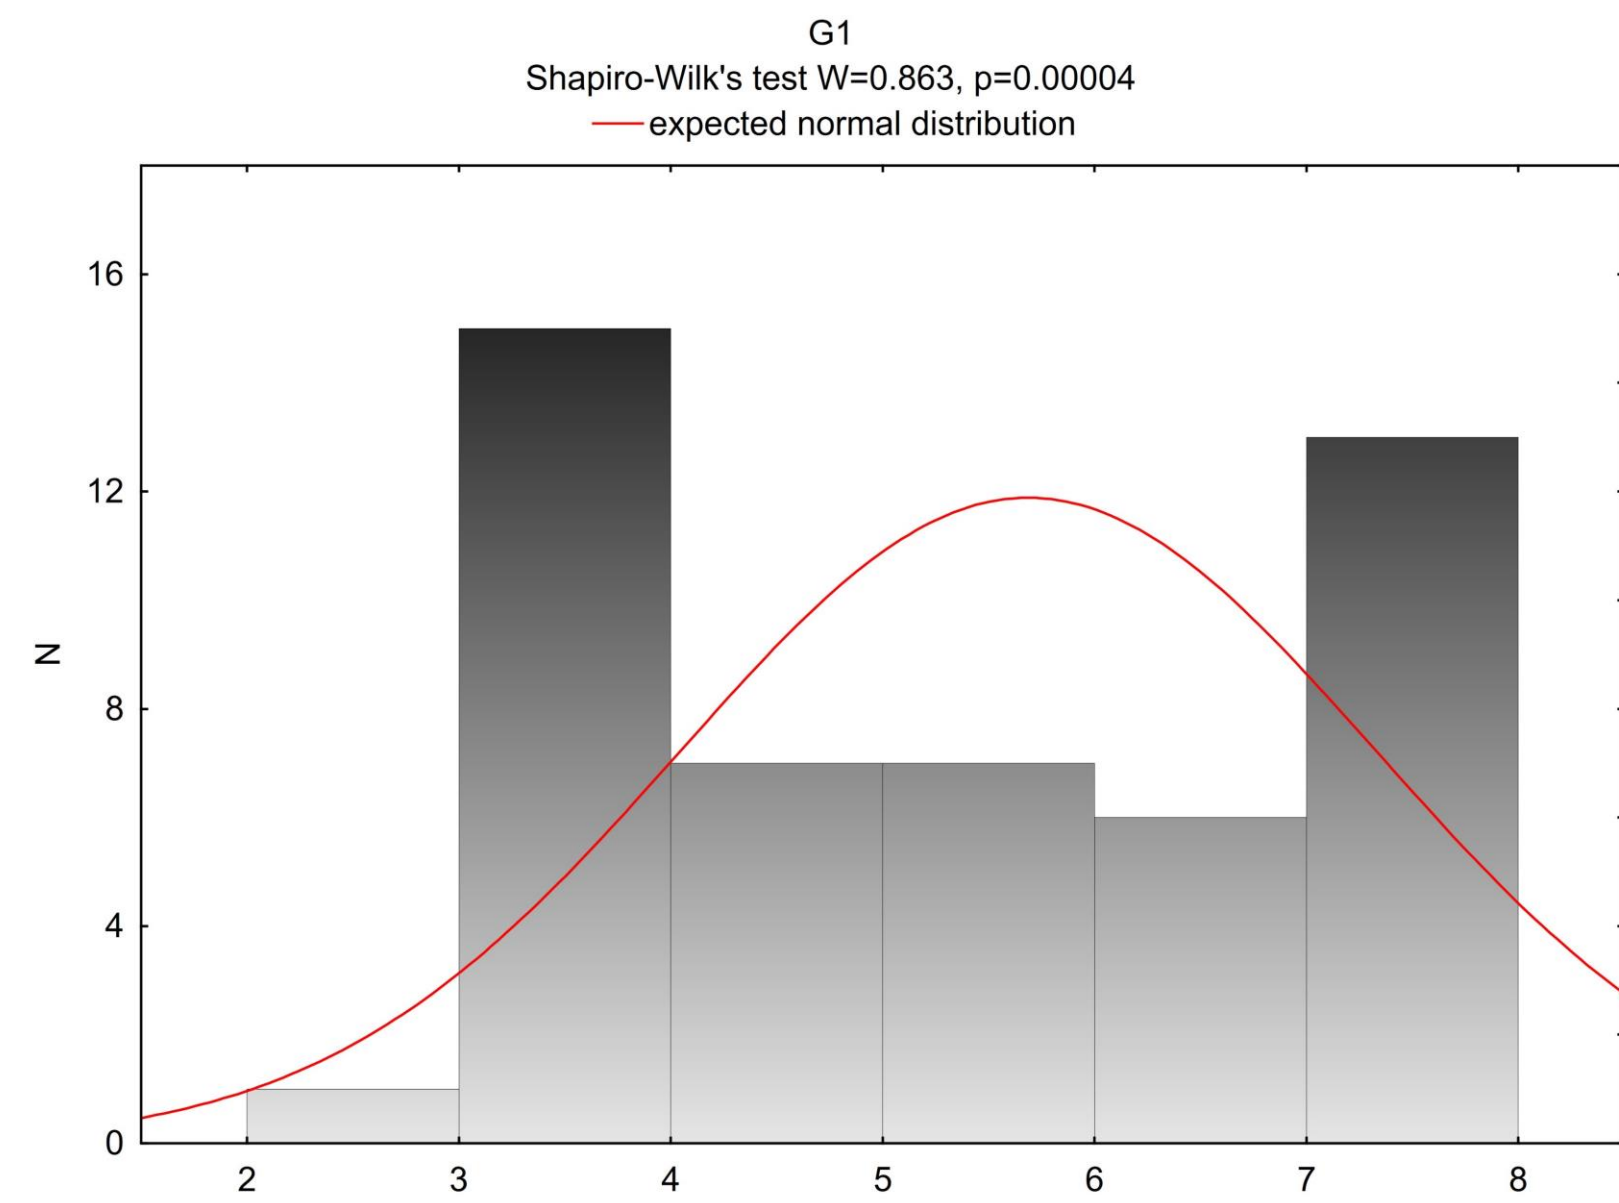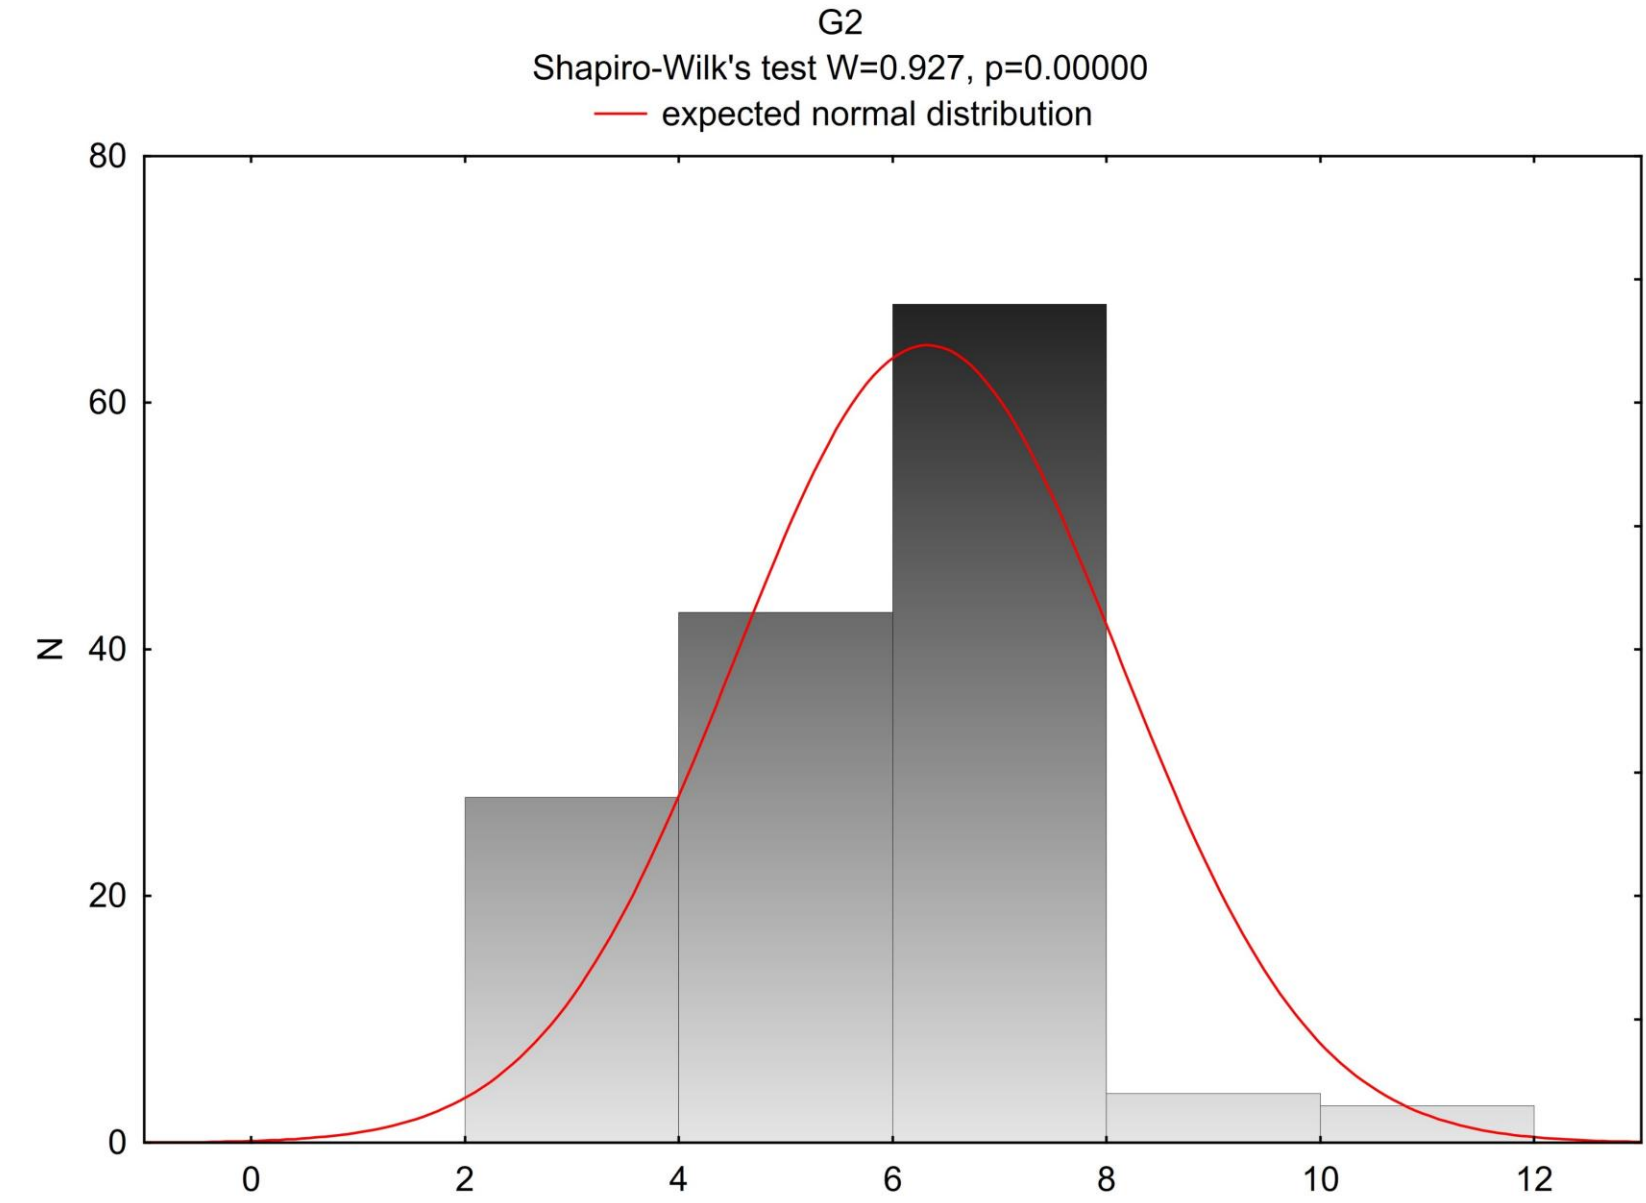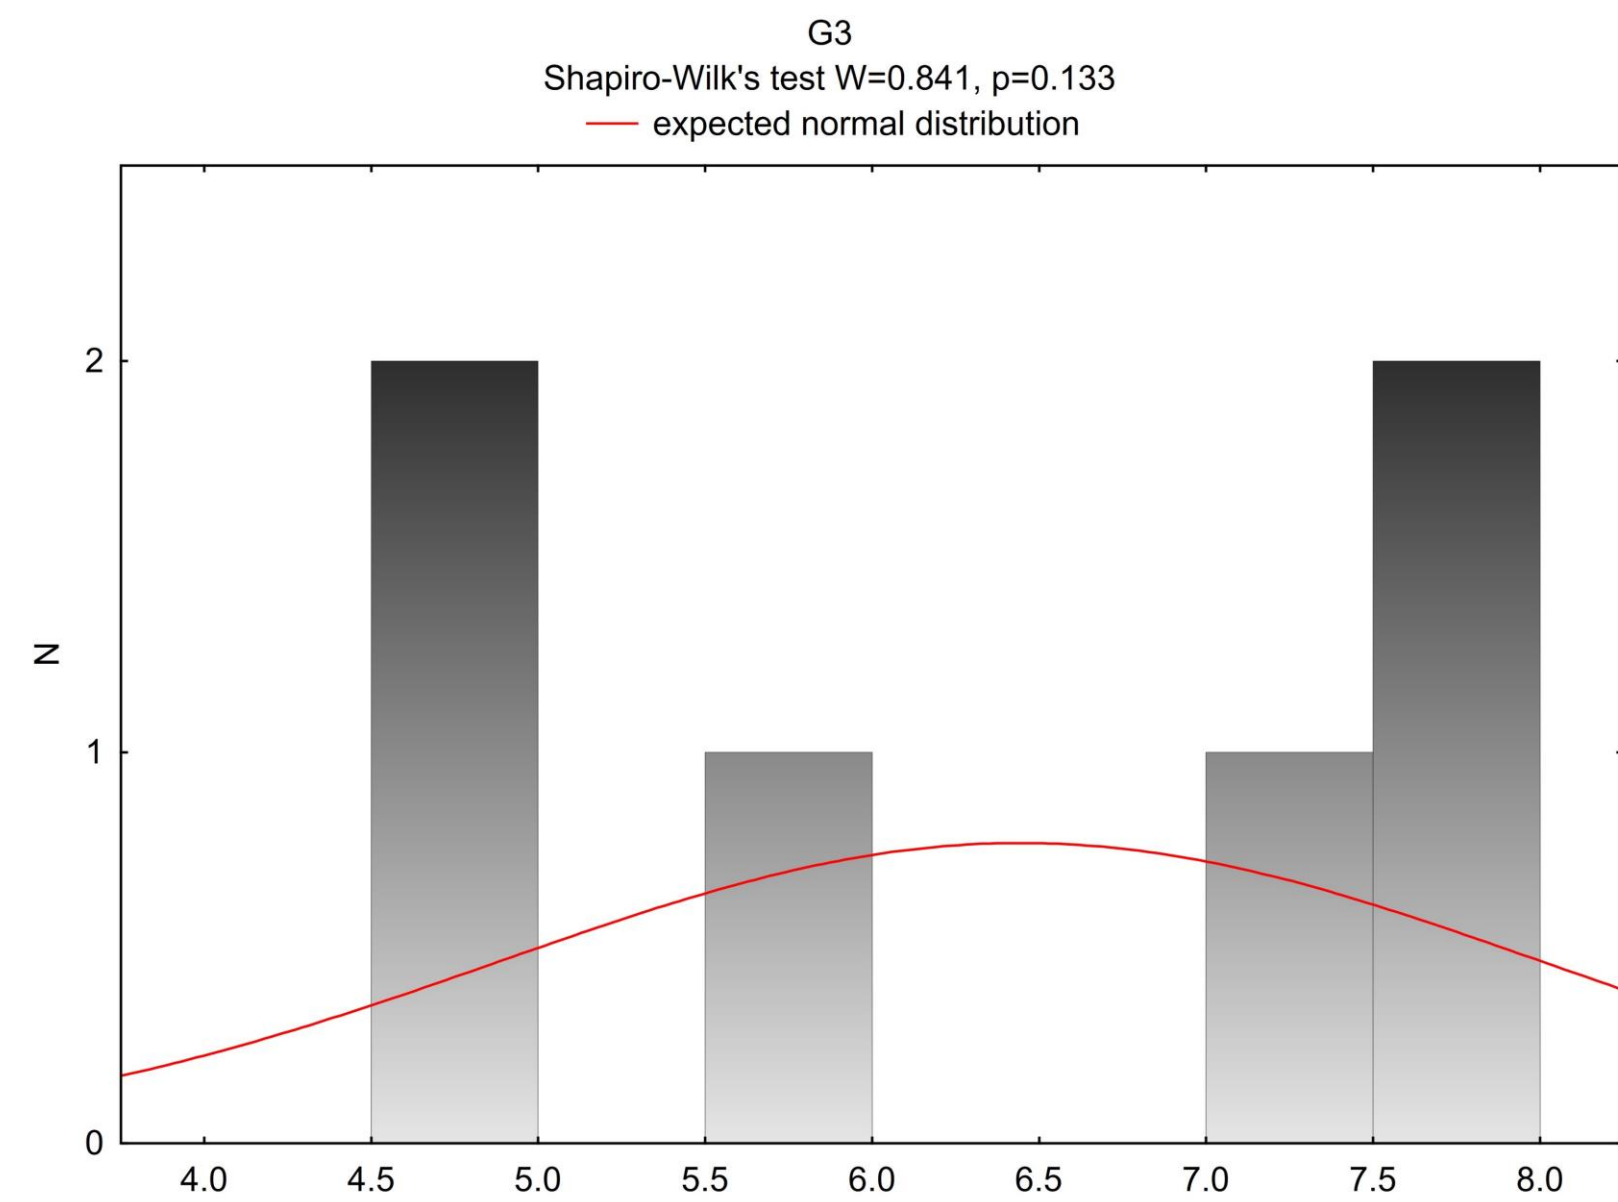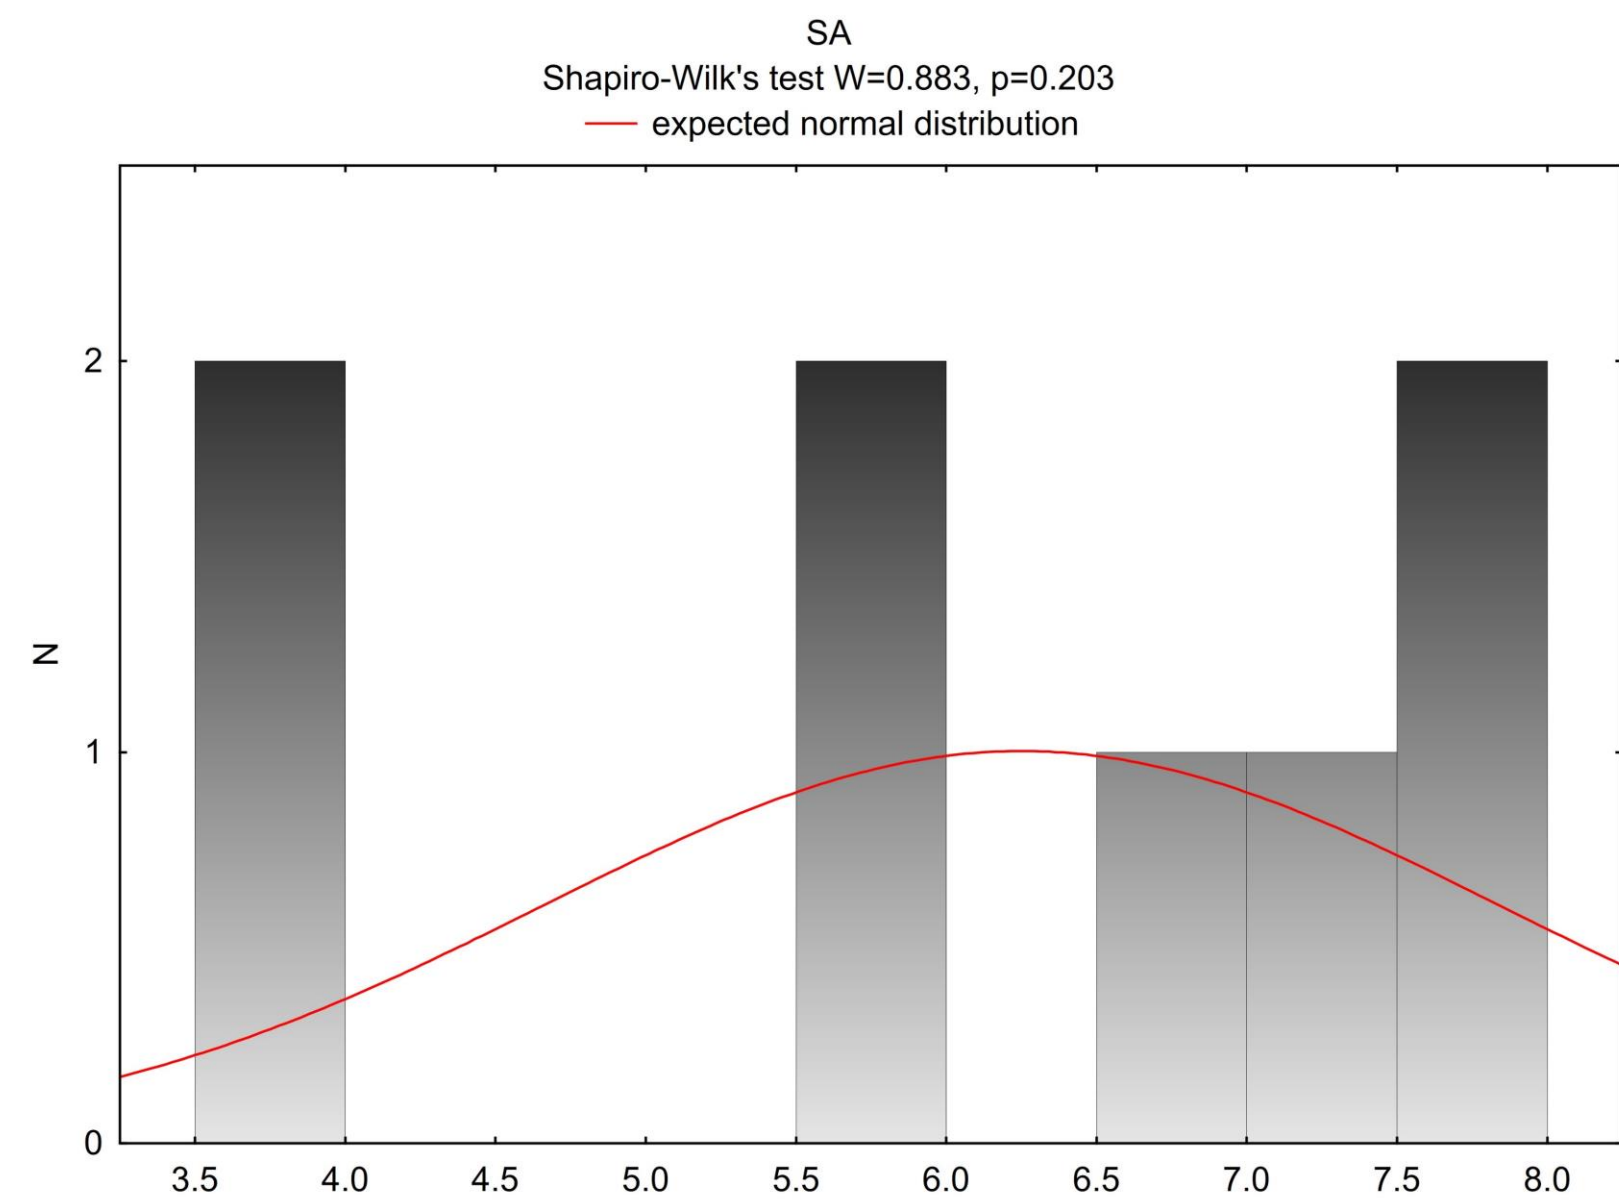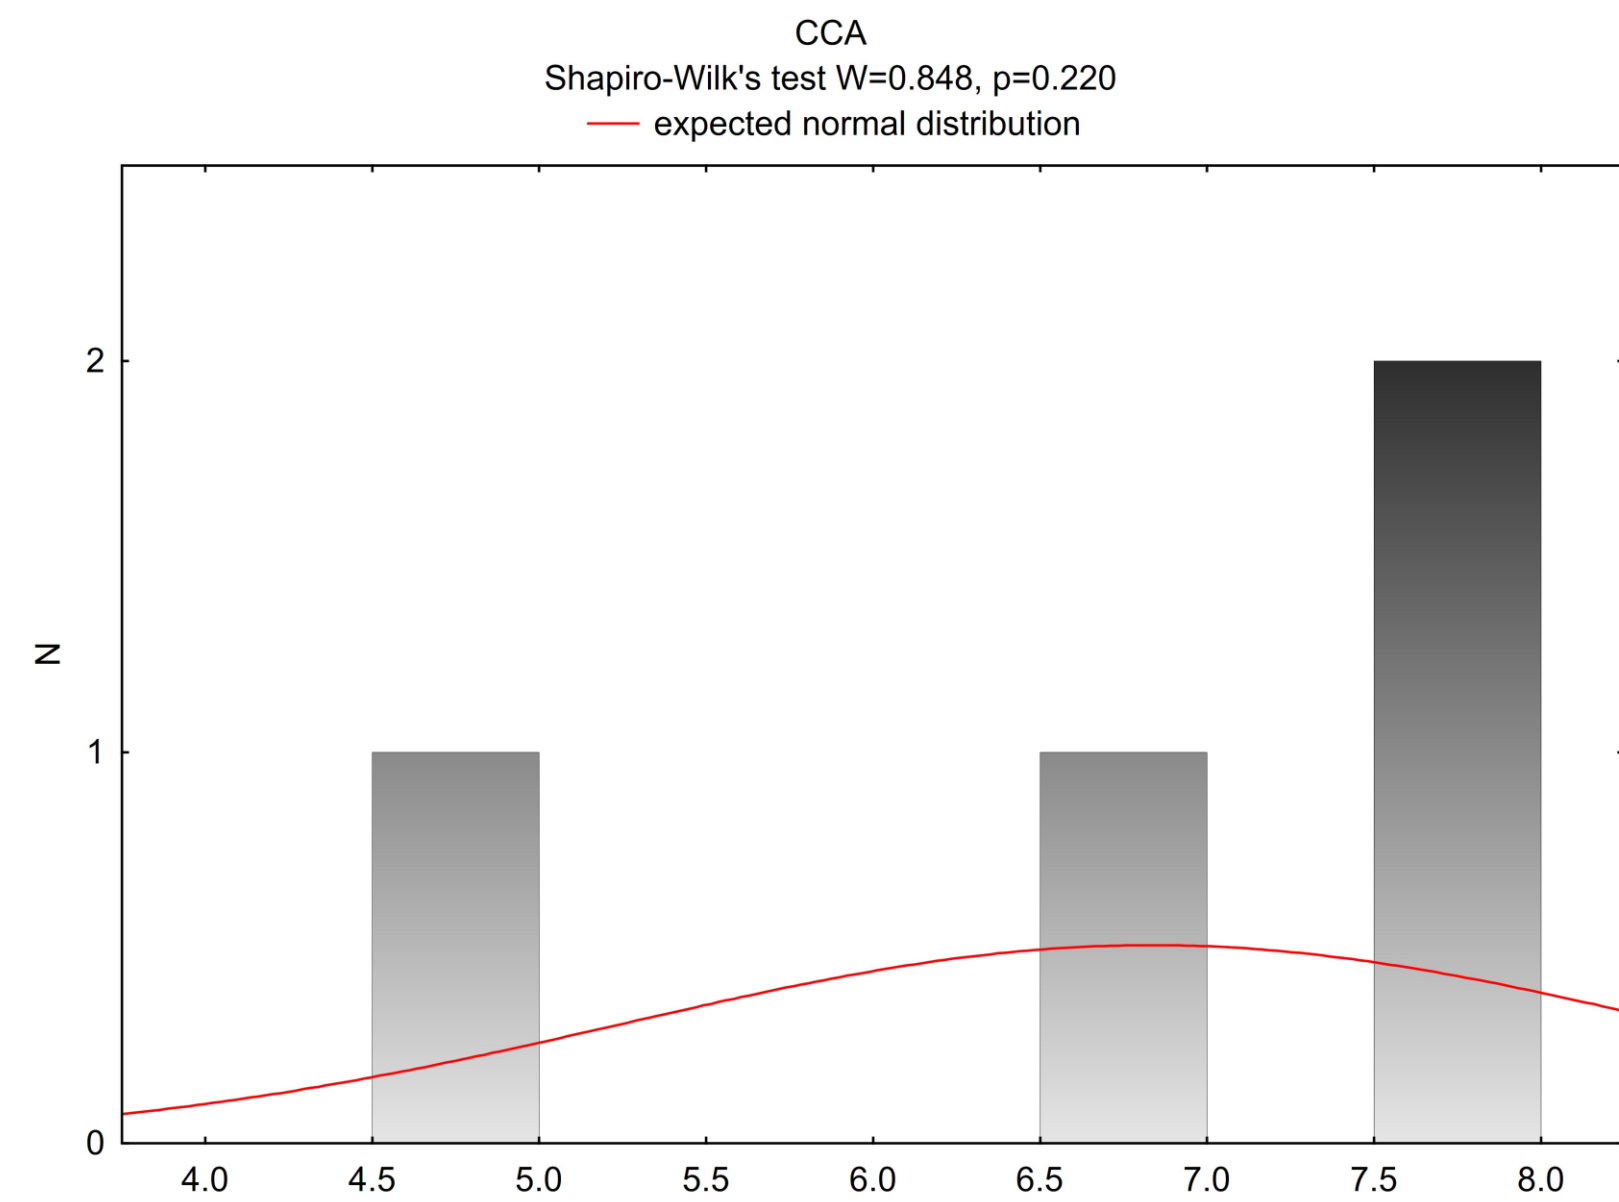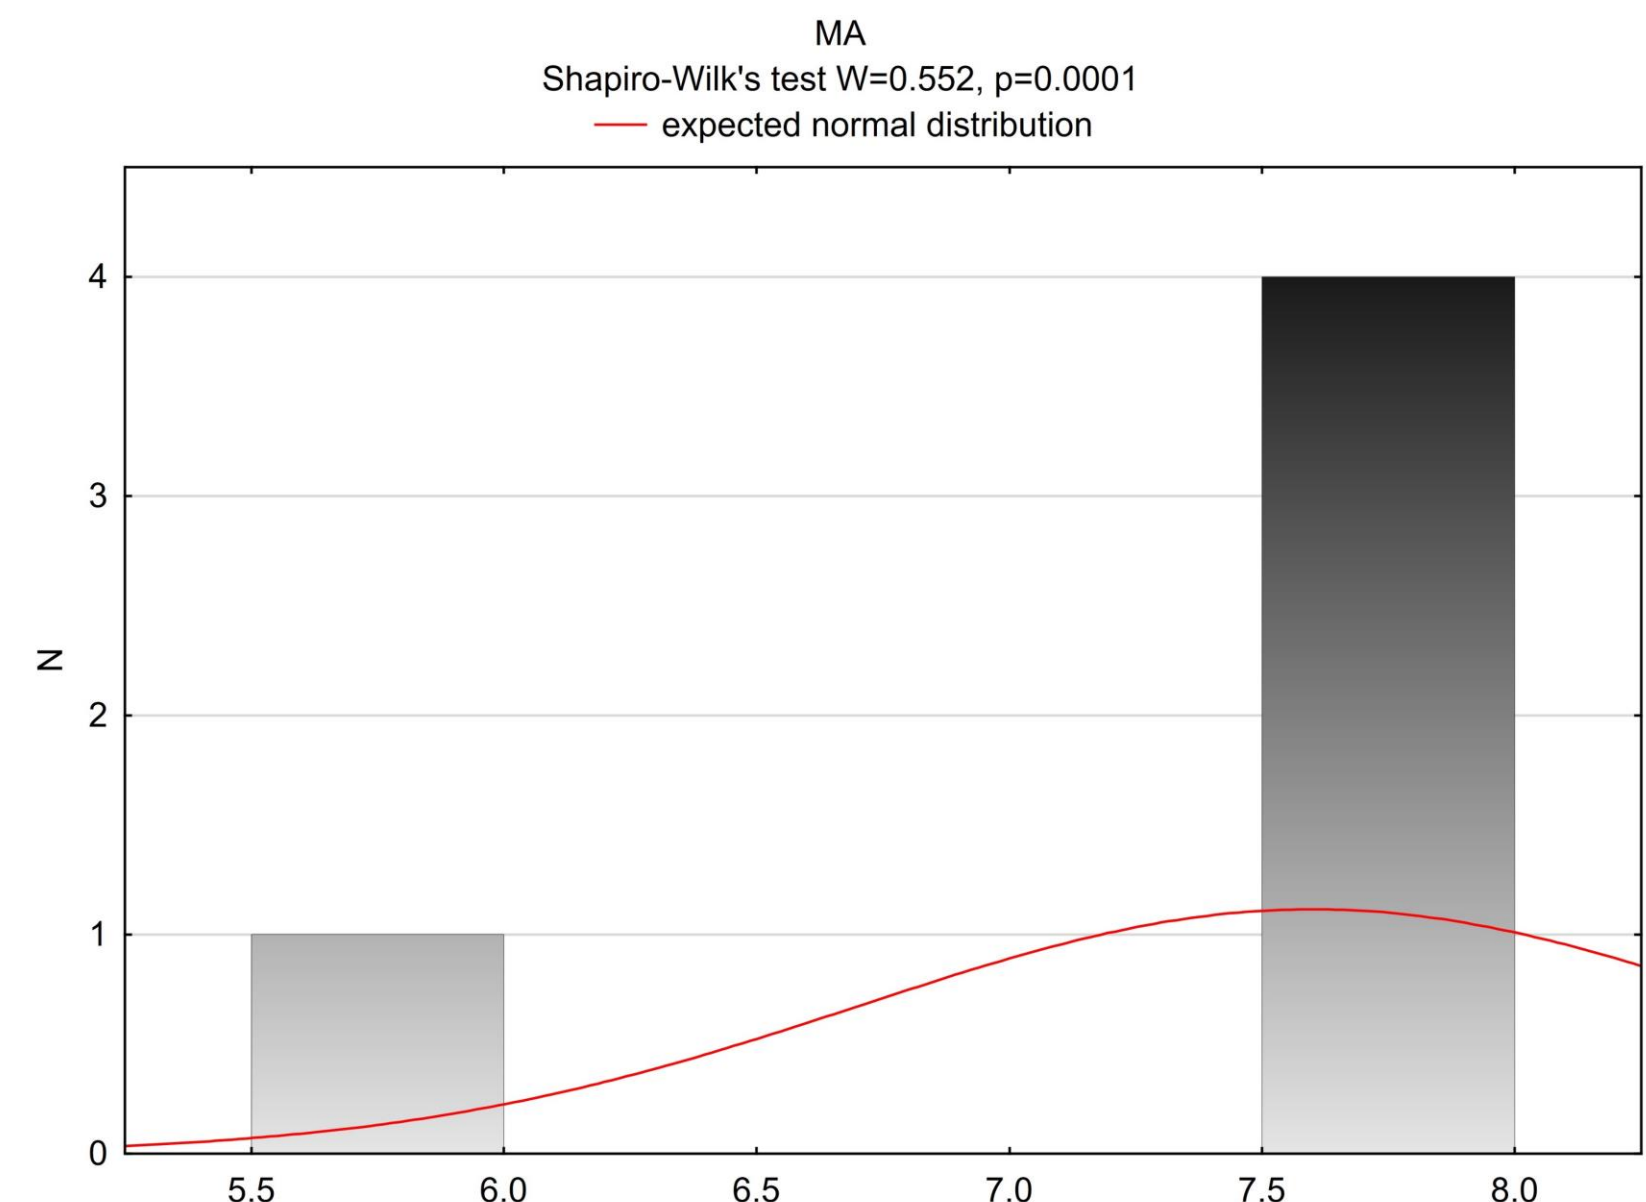

Supplement: s1 [file s1]

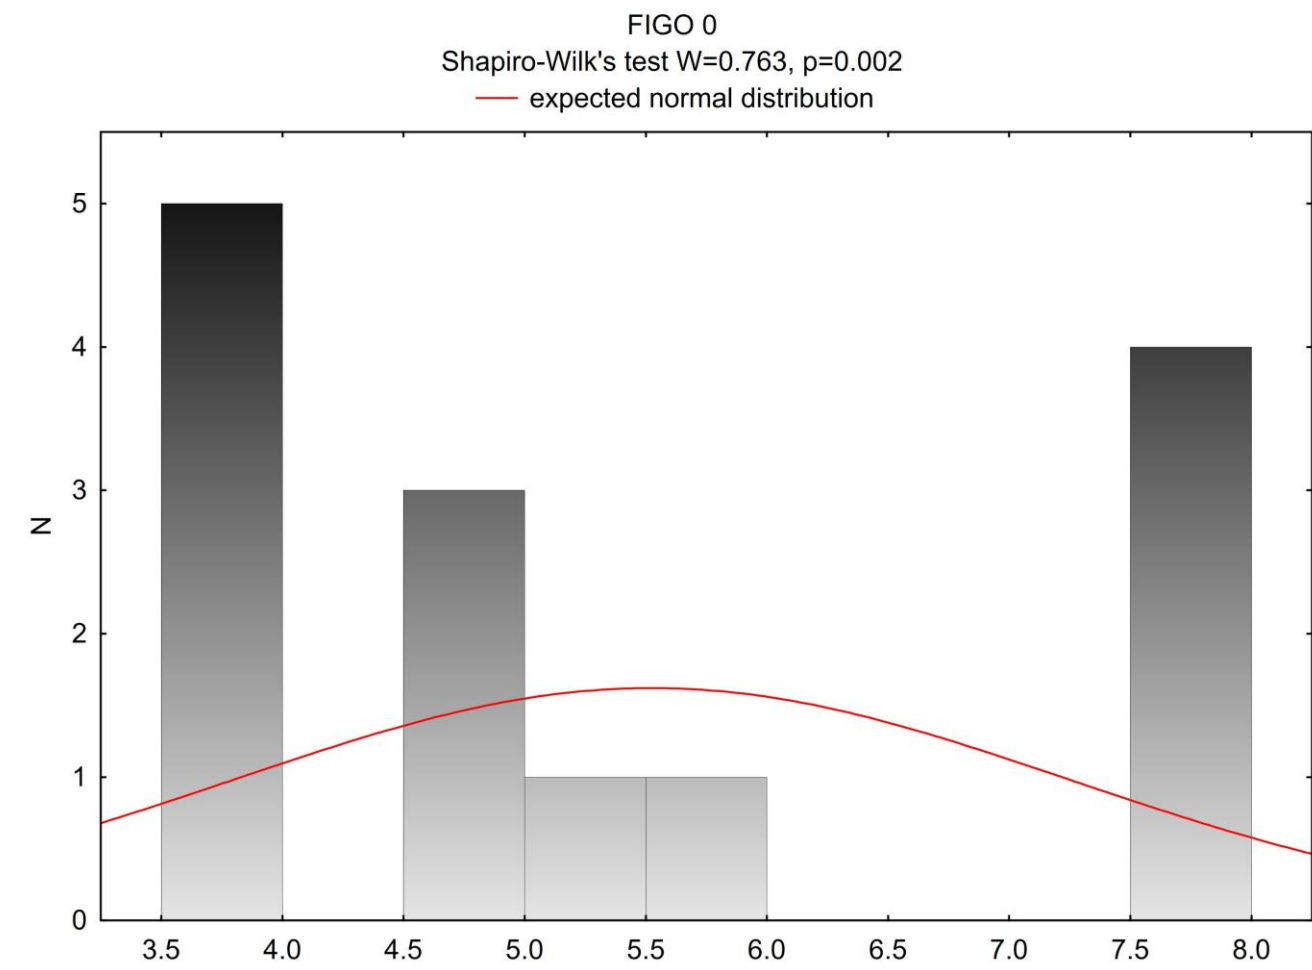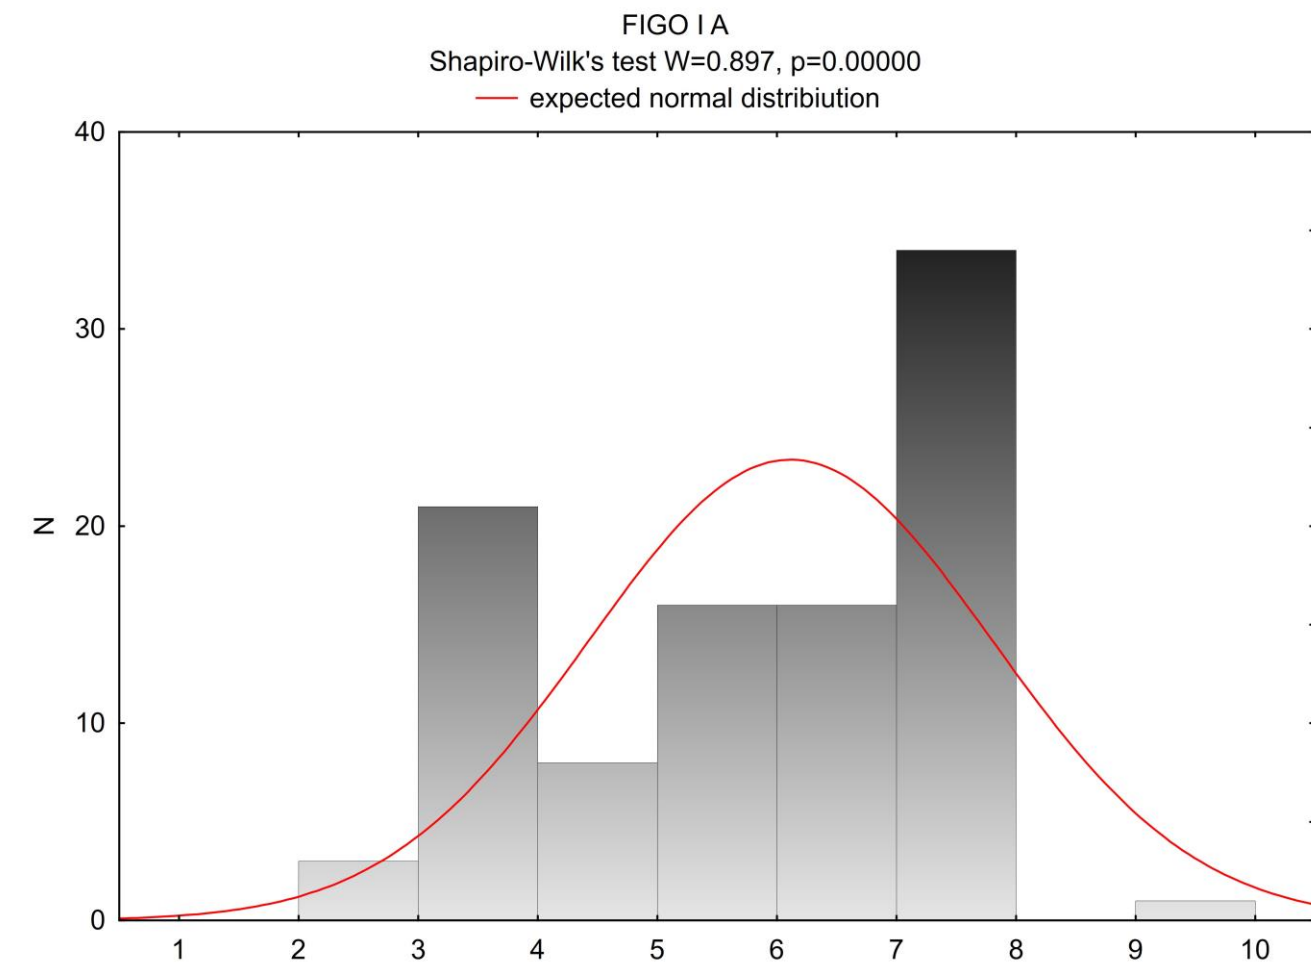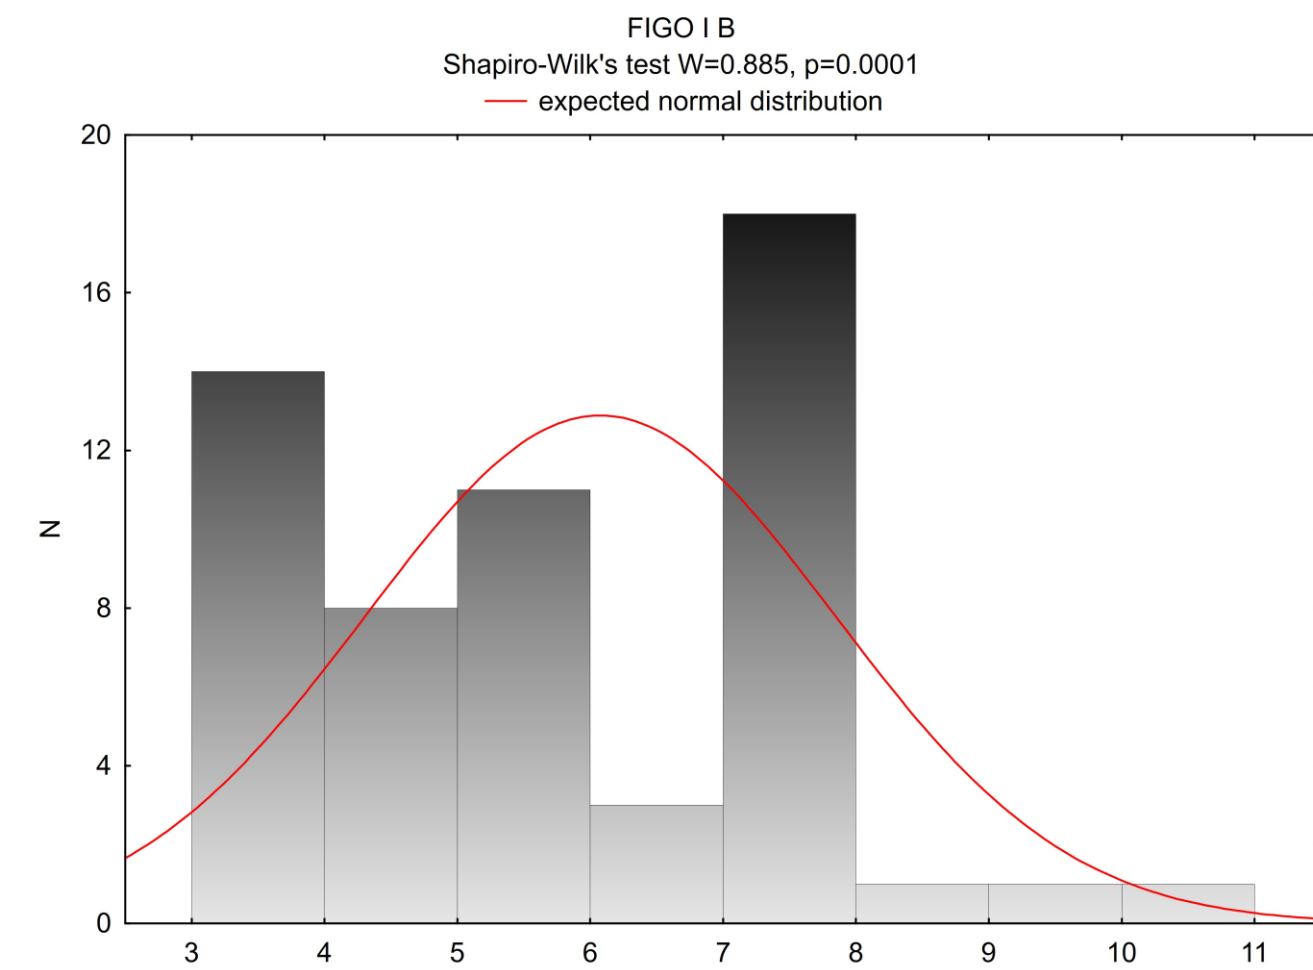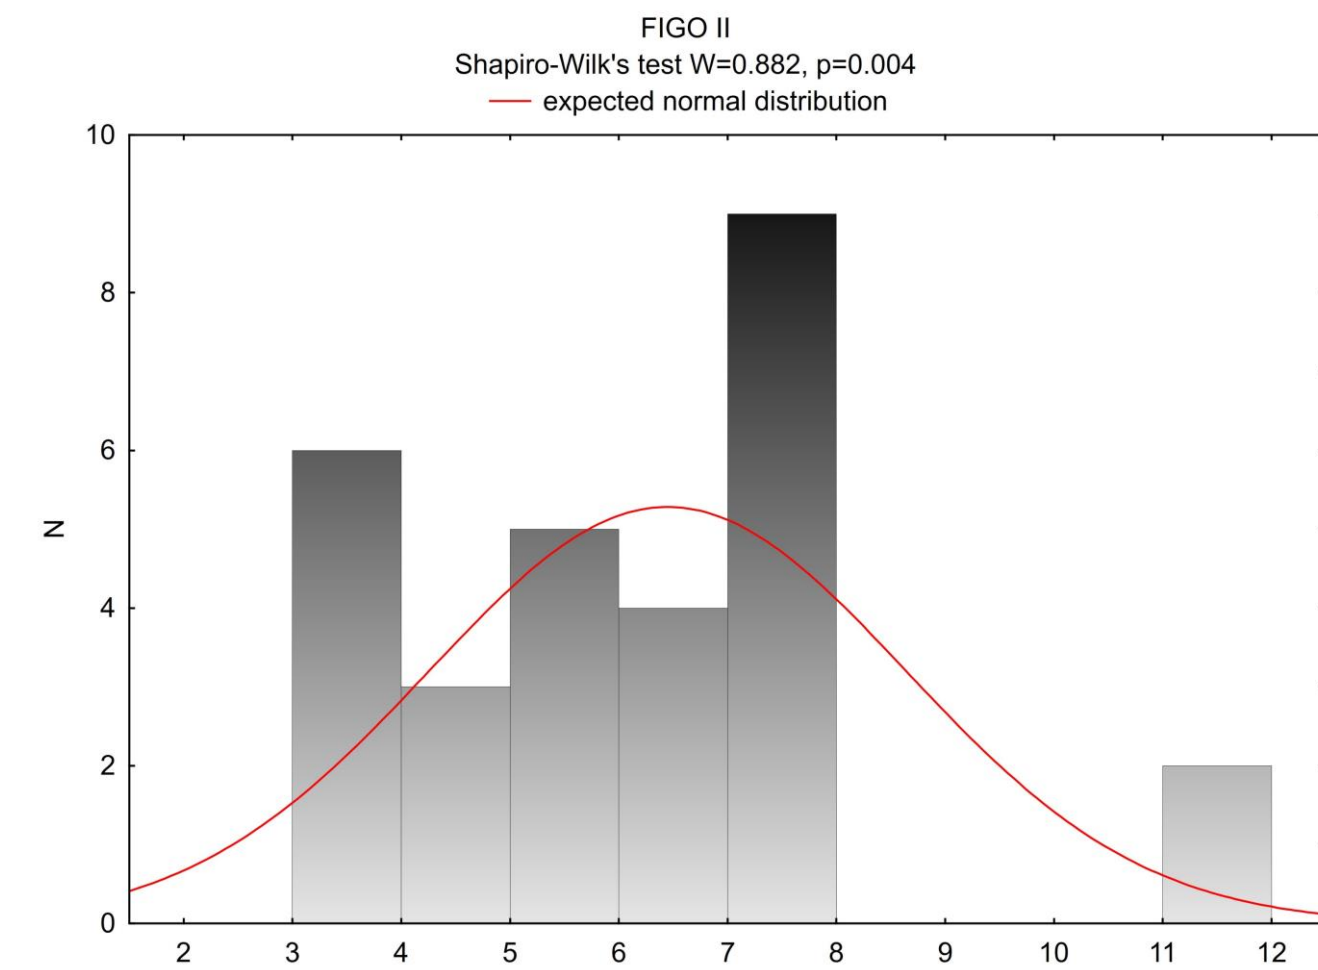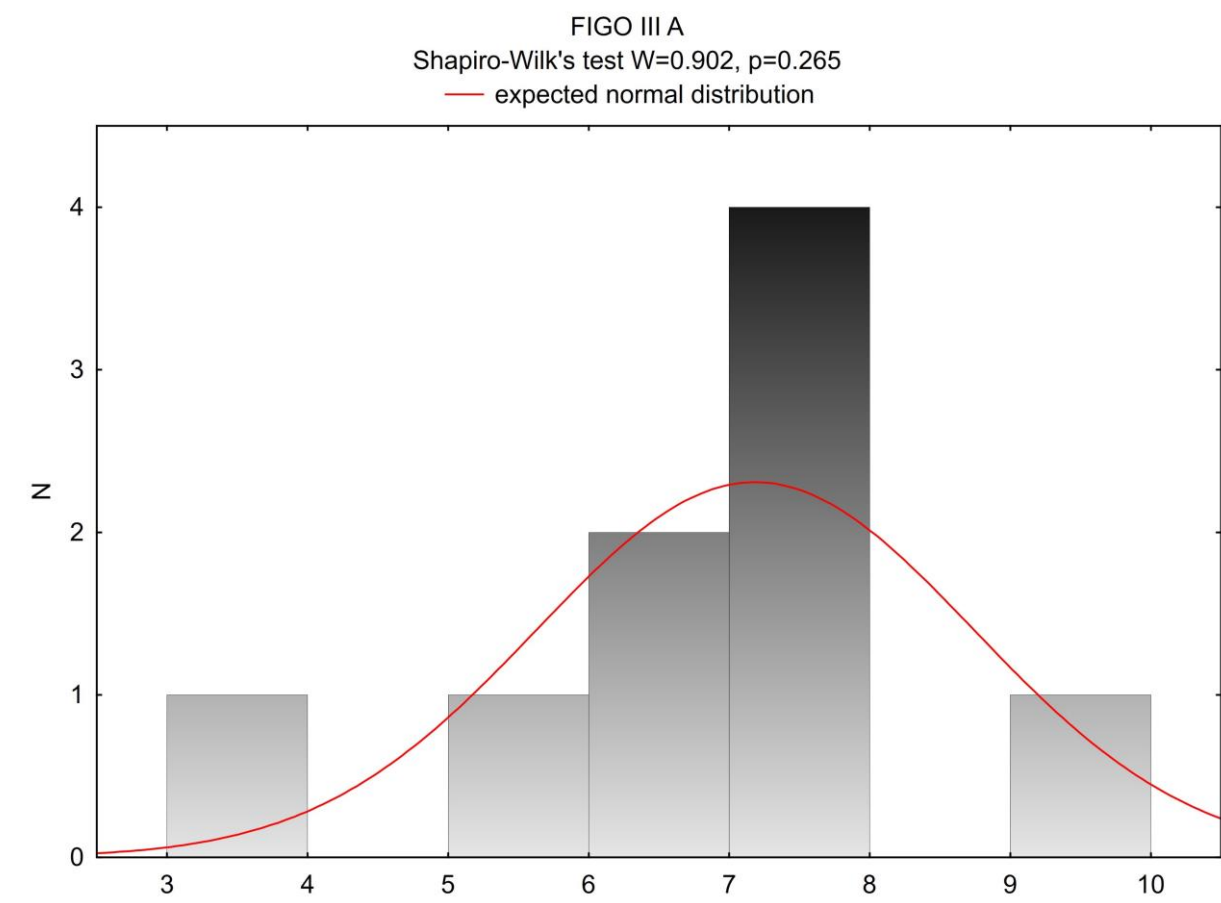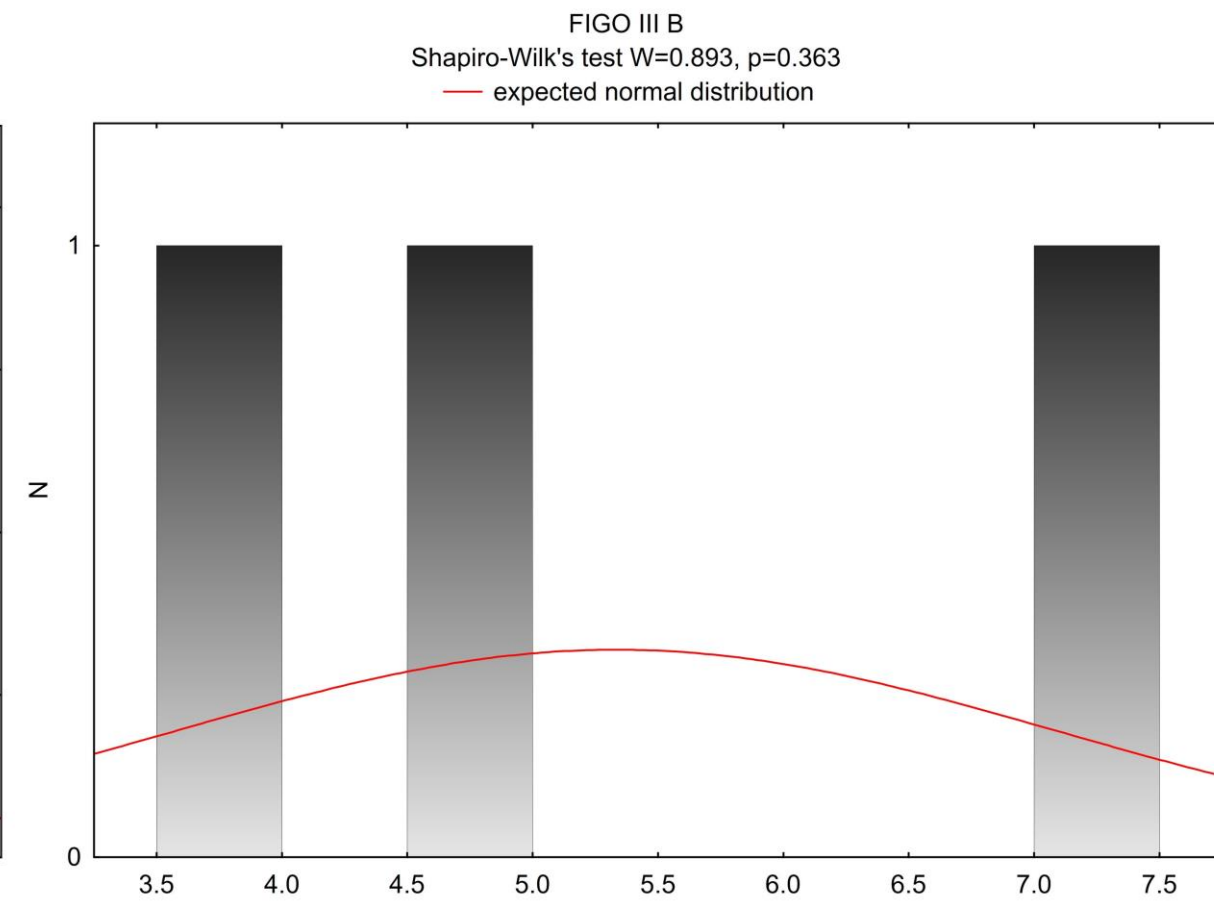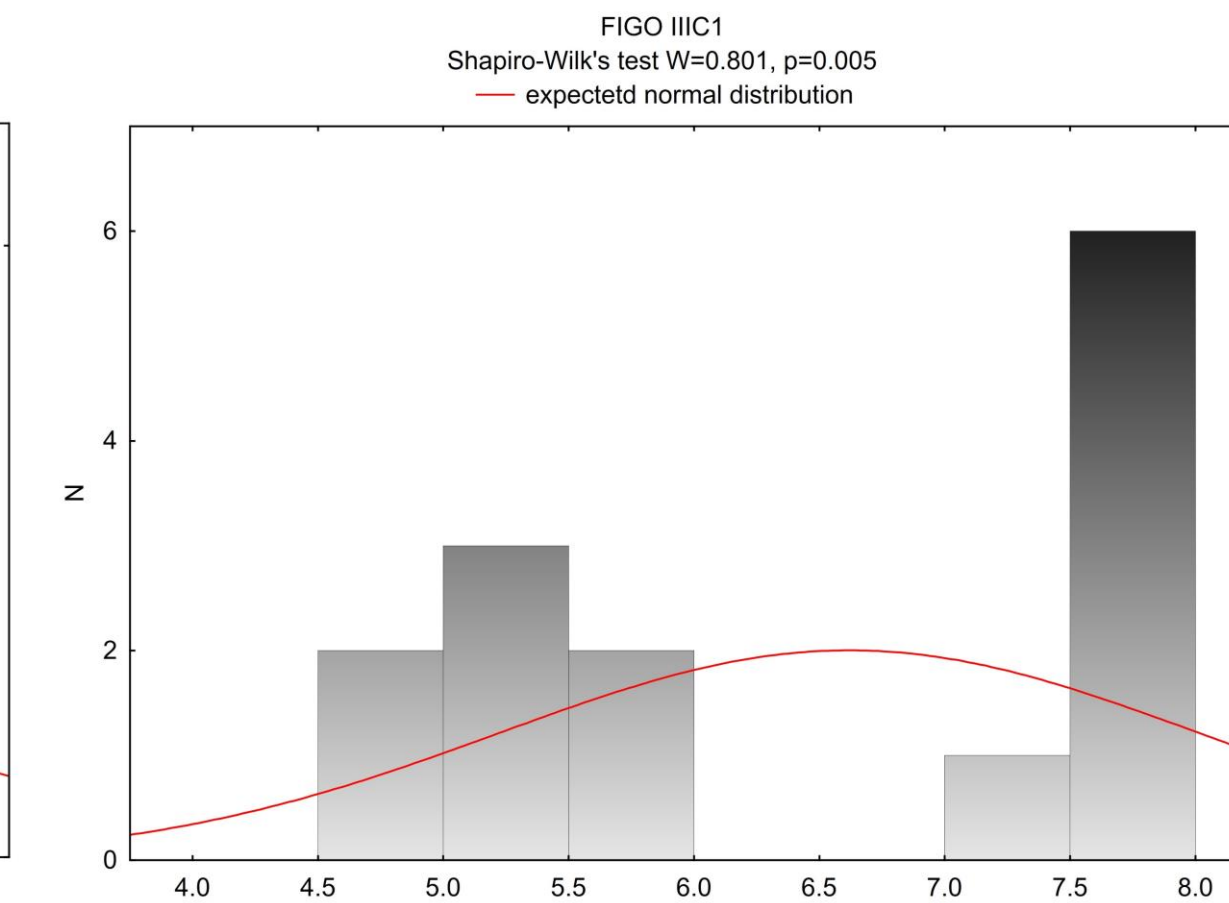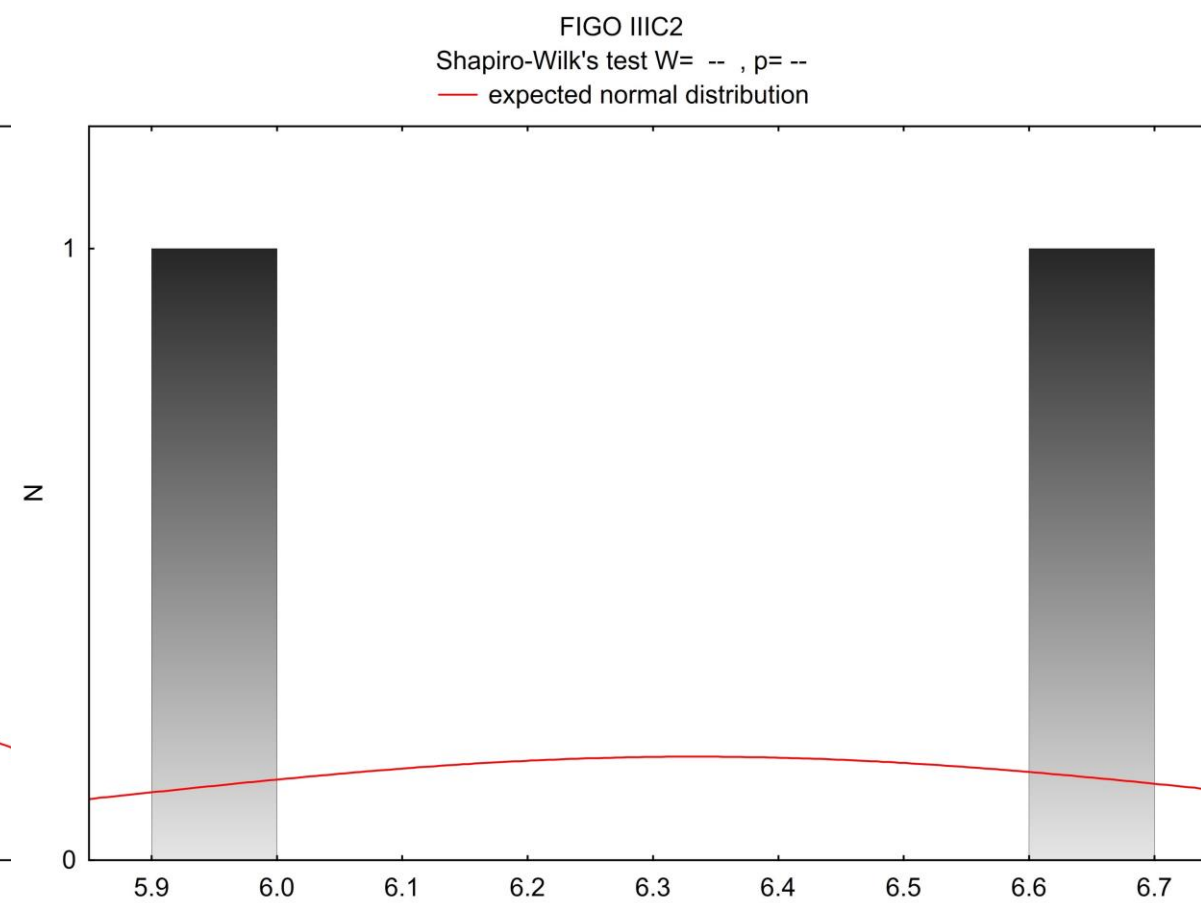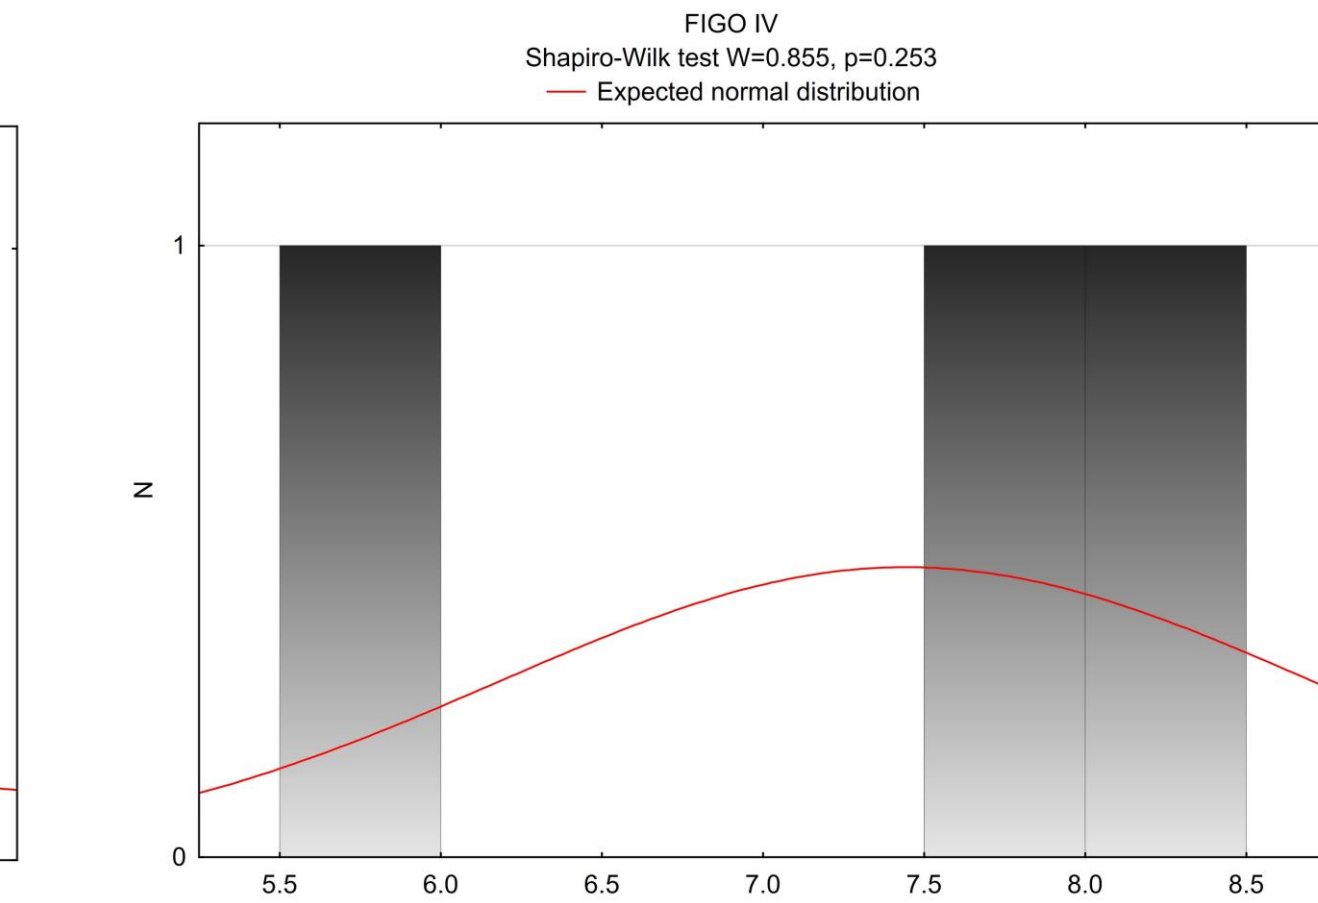

Supplement: s1 [file s1]
